# Supplementary material
Source: HighWire-hosted journal article supplement (https://bibliotheek.ehb.be:2666/highwire/filestream/147725/field_highwire_adjunct_files/0/bmjqs-2014-003690supp.pdf)
Supplement: bmjqs-2014-003690supp.pdf [file bmjqs-2014-003690supp.pdf]

## Appendix 1

**Table 2** Phase One focus group recruitment

| <b>Title</b>                | <b>Practice One</b> | <b>Practice Two</b> | <b>Practice Three</b> | <b>Practice Four</b> | <b>Total</b> |
|-----------------------------|---------------------|---------------------|-----------------------|----------------------|--------------|
| <i>Staff Focus Group</i>    |                     |                     |                       |                      |              |
| General Practitioner        | 5                   | 7                   | 2                     | 2                    | 16           |
| Practice Manager            | 1                   | 1                   | 1                     | 1                    | 4            |
| Practice Nurse              | 2                   | 1                   | 2                     | 1                    | 6            |
| Practice Secretary          | 0                   | 1                   | 0                     | 0                    | 1            |
| Lead Receptionist           | 0                   | 1                   | 0                     | 0                    | 1            |
| Healthcare Assistant        | 1                   | 0                   | 1                     | 1                    | 3            |
| IT lead                     | 1                   | 0                   | 0                     | 0                    | 1            |
| Office manager              | 1                   | 0                   | 1                     | 1                    | 3            |
| <i>Patient Focus Groups</i> |                     |                     |                       |                      |              |
| Patient                     | 14                  | 9                   | 3                     | 2                    | 28           |

**Table 3** Phase Two focus group recruitment

| <b>FOCUS GROUP ONE</b>                               | <b>FOCUS GROUP TWO</b>                    |
|------------------------------------------------------|-------------------------------------------|
| <b>Title Practice (Gender)</b>                       | <b>Title Practice (Gender)</b>            |
| <b>Practice Manager Practice 1 (Female)</b>          | <b>Patient 2 Practice 1 (Female) *</b>    |
| <b>Reception Manager Practice 1 (Female)</b>         | <b>Patient 3 Practice 1 (Male) *</b>      |
| <b>Information Technology Lead Practice 1 (Male)</b> | <b>Office Manager Practice 3 (Female)</b> |
| <b>Patient Practice 1 (Female)</b>                   | <b>Research Nurse Practice 3 (Female)</b> |
| <b>Phlebotomist Practice 3 (Female)</b>              | <b>Patient Practice 4 (Male)</b>          |
| <b>Practice Secretary Practice 2 (Female)</b>        |                                           |
| <b>Lead Receptionist Practice 2 (Female)</b>         |                                           |
| <b>Patient Practice 4 (Male)</b>                     |                                           |
| <b>Patient Practice 2 (Male)</b>                     |                                           |
| <b>Patient Practice 3 (Female)</b>                   |                                           |

*\*Also took part in Phase One focus groups*
